# Supplementary material for: A pH-sensitive guar gum-grafted-lysine-β-cyclodextrin drug carrier for the controlled release of 5-flourouracil into cancer cells
Source: Royal Society of Chemistry journal article supplement (doi:10.1039/c7tb02551c), 2018-01-01
Supplement: c7tb02551c1.pdf [file c7tb02551c1.pdf]

Supporting Information

**pH-sensitive Guar Gum Grafted Lysine- $\beta$ -Cyclodextrin Drug Carrier for Controlled  
Releases on Cancer Cells**

Rajendran Amarnath Praphakar<sup>a</sup>, Murugan Jeyaraj<sup>b</sup>, Sivaraj Mehnath<sup>b</sup>, Akon Higuchi<sup>c</sup>,  
Deepalekshmi Ponnamm<sup>d</sup>, Kishor Kumar Sadasivuni<sup>d</sup>, Mariappan Rajan <sup>a\*</sup>

<sup>a\*</sup>Biomaterials in Medicinal chemistry laboratory, Department of Natural Products Chemistry,  
Madurai Kamaraj University, Madurai-625021, Tamil Nadu, India.

<sup>b</sup>National Centre for Nanoscience and Nanotechnology, University of Madras, Chennai,  
India.

<sup>c</sup>Department of Chemical and Materials Engineering, National Central University, Jhong-Li,  
Taoyuan 320, Taiwan

<sup>d</sup>Centre for Advanced Materials, Qatar University, 2713 Doha, Qatar.

\*Corresponding author.

E-mail: rajanm153@gmail.com; rajanm153.chem@mkuniversity.org (Mariappan Rajan)

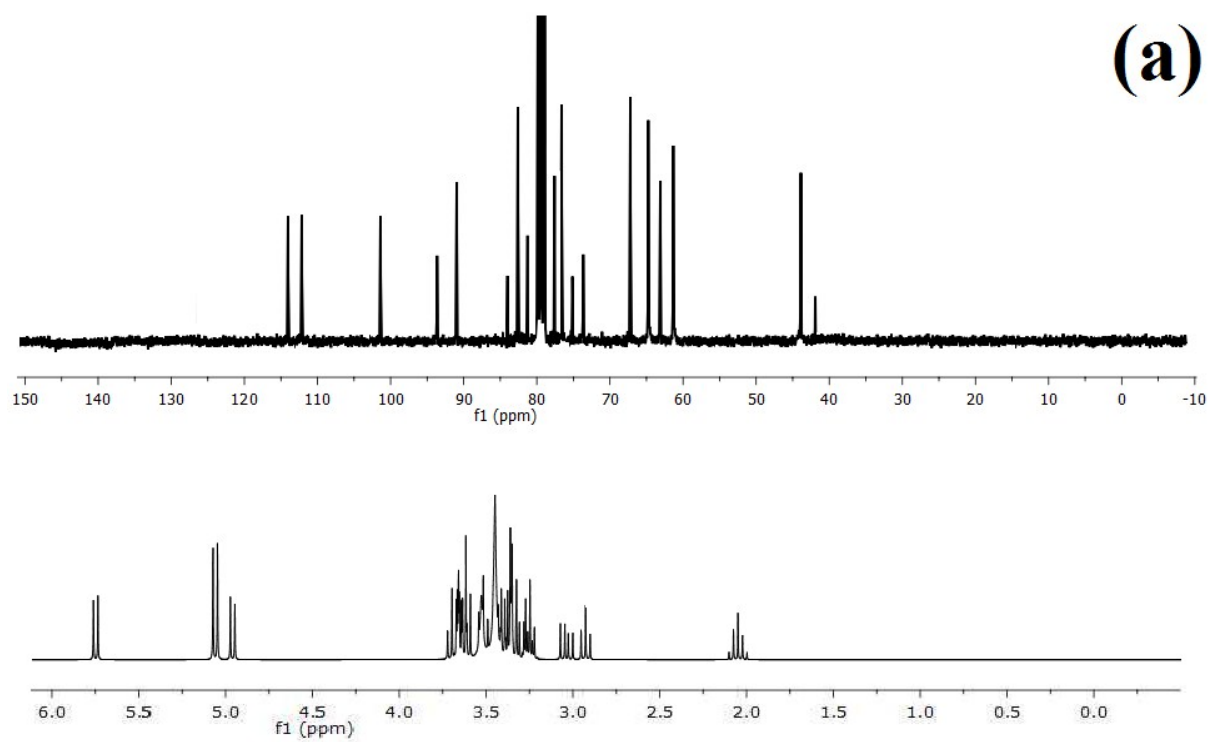

**Figure S1.**  $^1\text{H}$  and  $^{13}\text{C}$  NMR spectrum of guar gum

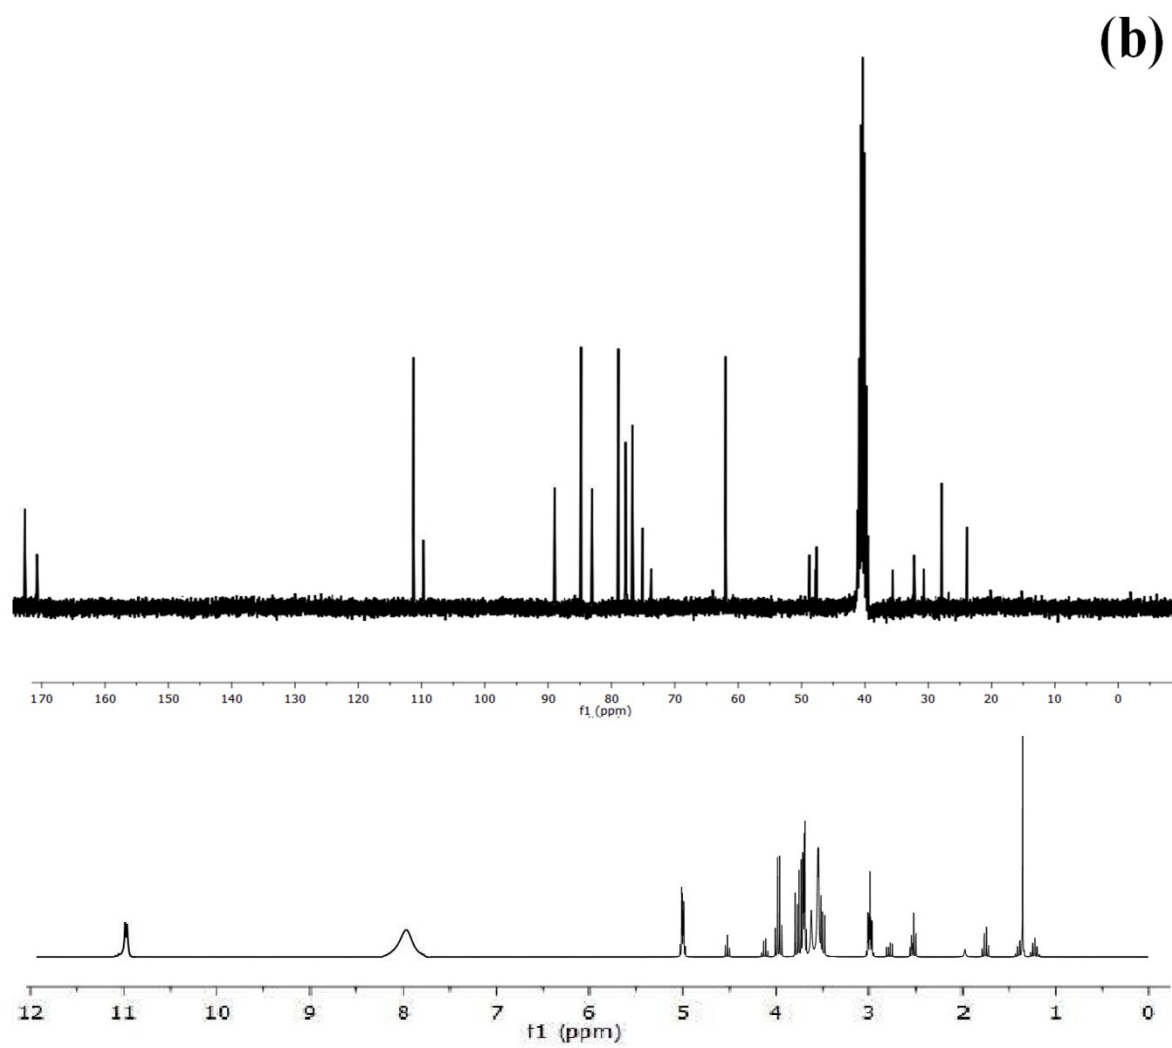

**Figure S2.**  $^1\text{H}$  and  $^{13}\text{C}$  NMR spectrum of guar gum

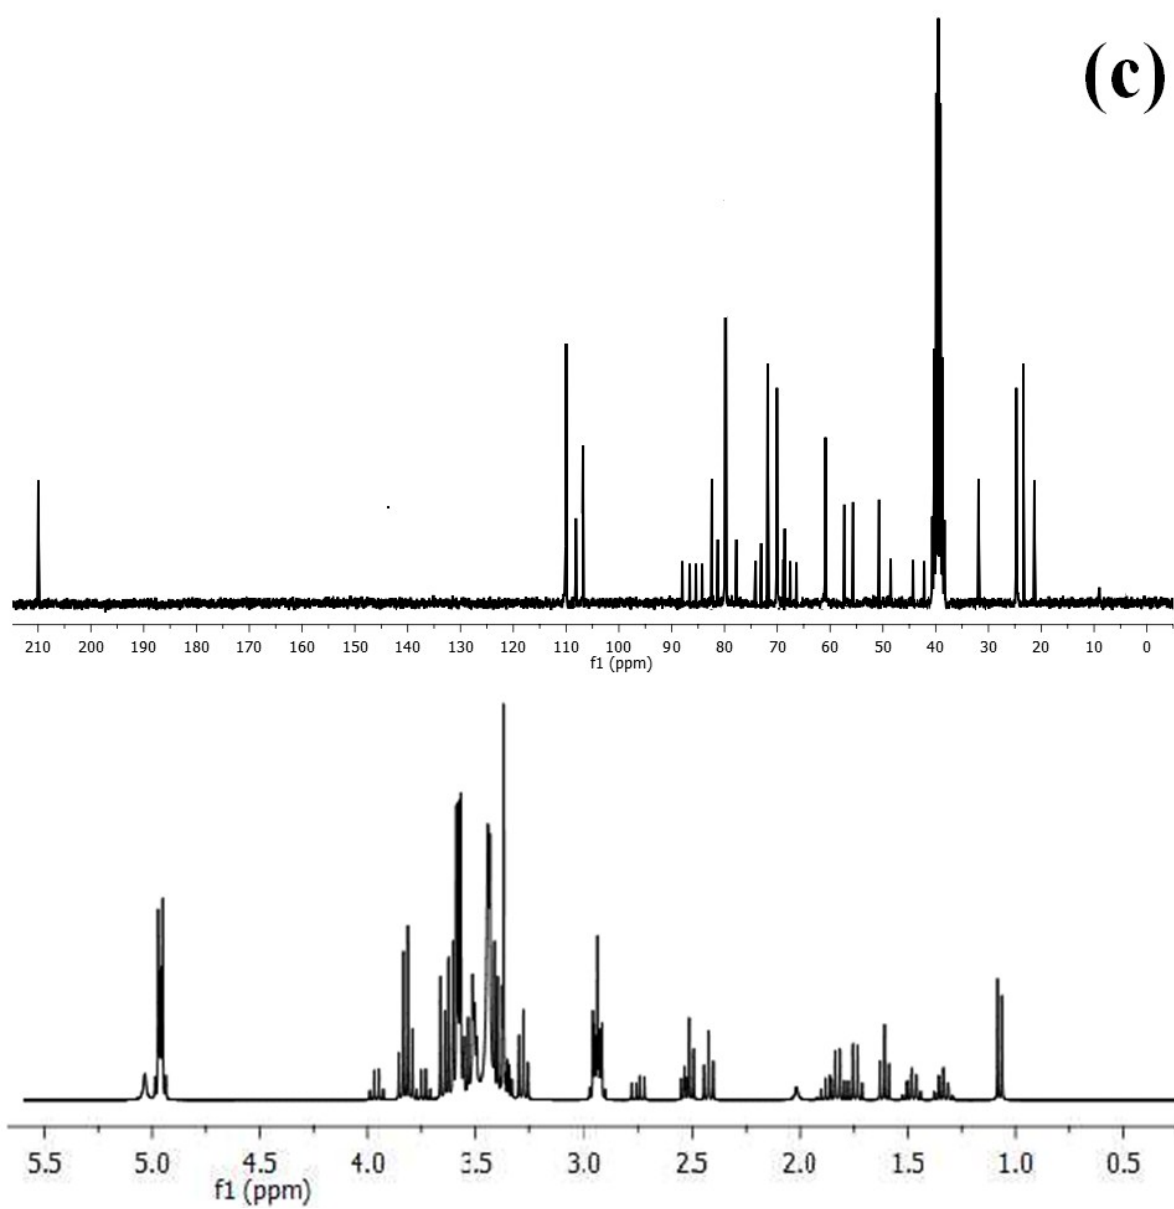

**Figure S3.**  $^1\text{H}$  and  $^{13}\text{C}$  NMR spectrum of guar gum

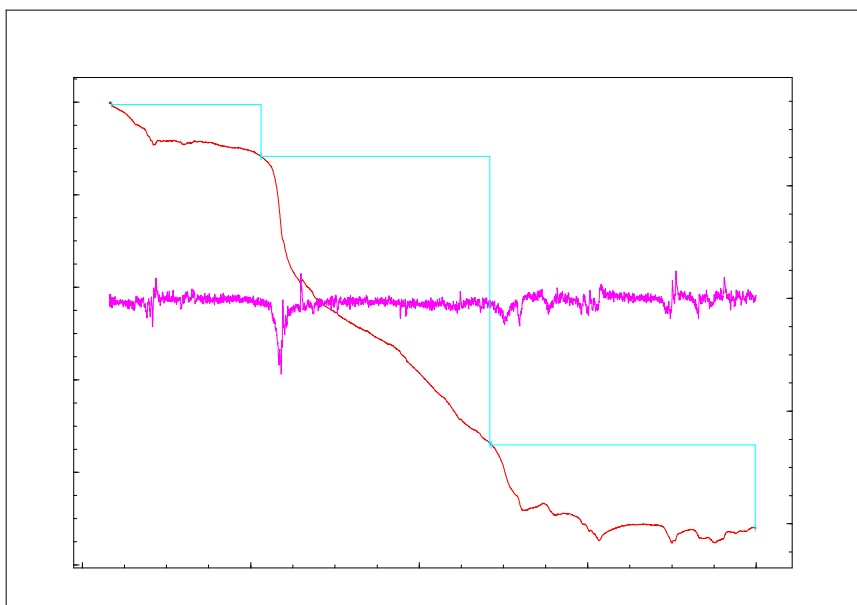

**Figure S4.** TGA curves of  $\beta$ -CD-L

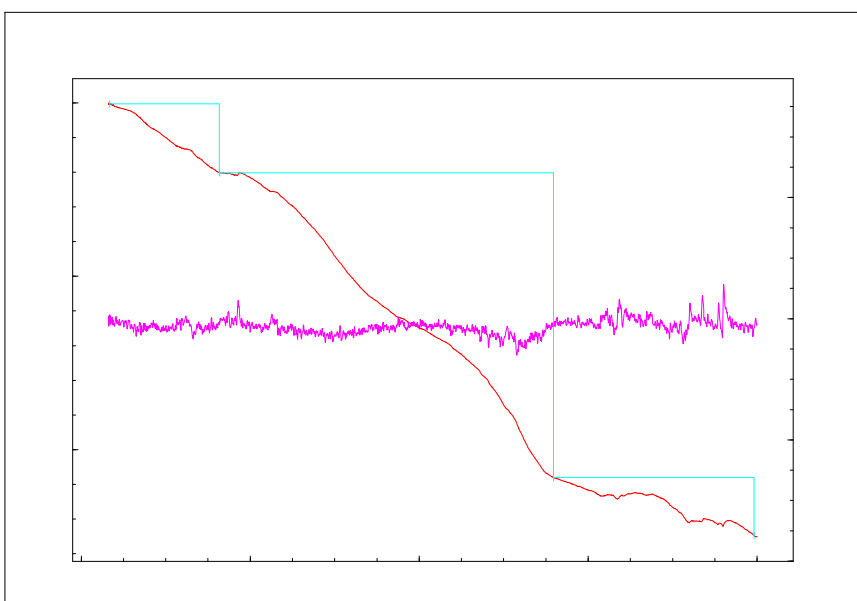

**Figure S5.** TGA curves of GG-g-L- $\beta$ -CD

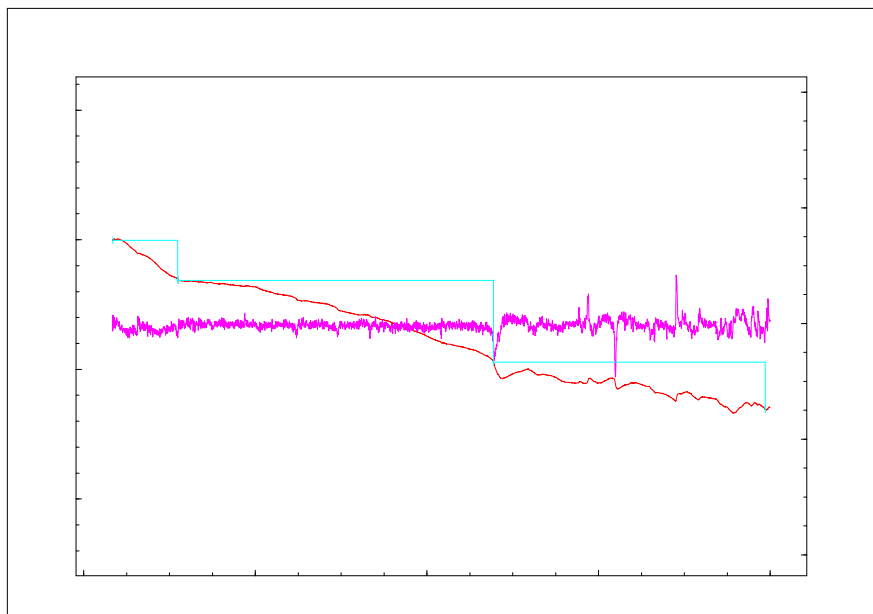

**Figure S6.** TGA curves of 5-FU loaded GG-g-L- $\beta$ -CD

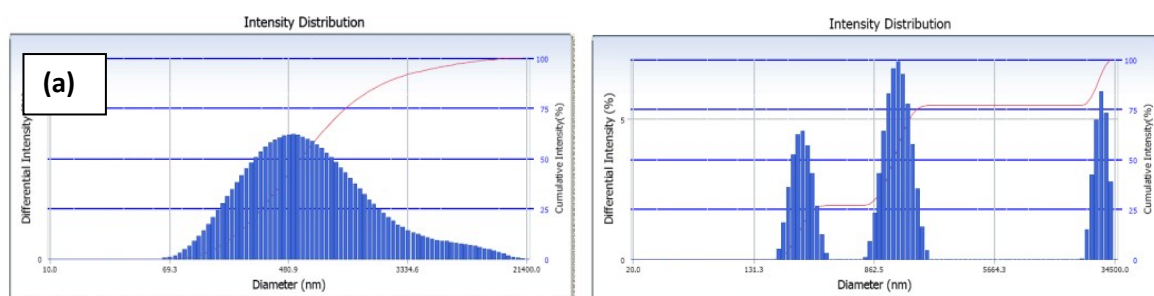

**Figure S7.** Particles size distribution of (a) 5-FU loaded GG-g-L- $\beta$ -CD micro-carrier and (b) 5-FU loaded GG-g-L- $\beta$ -CD polymer.

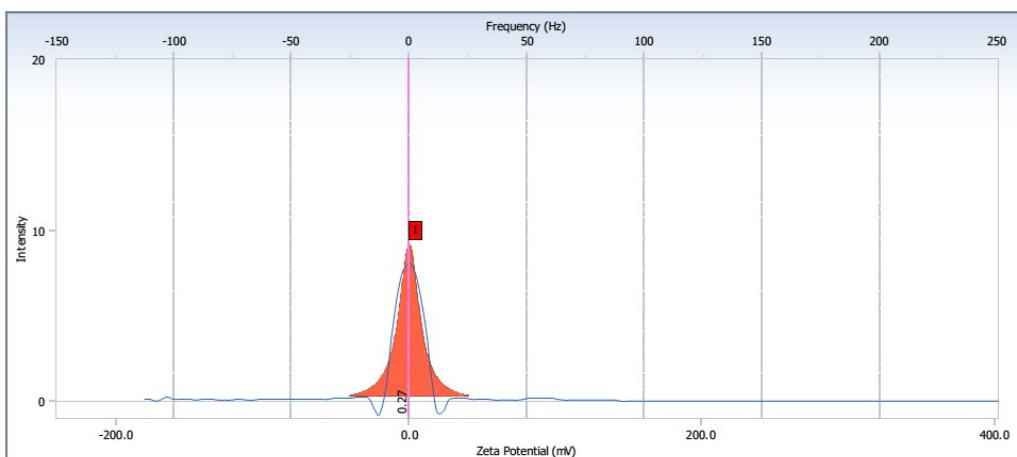

**Figure.S8.** Zeta potential of 5-FU loaded GG-g-L- $\beta$ -CD polymer.

### 3.6 5-FU encapsulation studies

The encapsulation of 5-FU into the polymeric microspheres was done by solvent evaporation technique. The choice of encapsulation method was based on the solubility of both polymer and drug. In this approach, polymer was dispersed in water and 5-FU dissolved in ethanol. The encapsulation efficiency of 5-FU is shown in the Figure. 8. The intensity of absorbance gradually decreases as an increase in time. It indicates that the successful encapsulation of 5-FU into GG-g-L- $\beta$ -CD microcarrier.

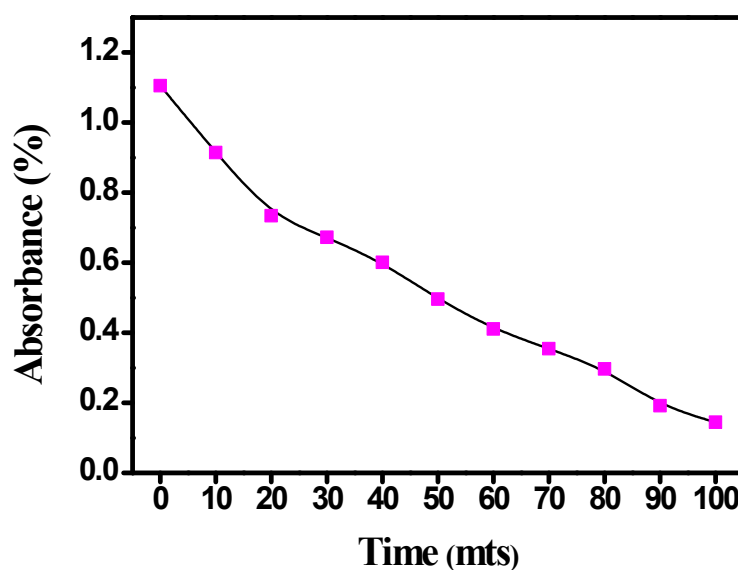

**Figure S9.** 5-FU encapsulation profile into GG-g-L- $\beta$ -CD

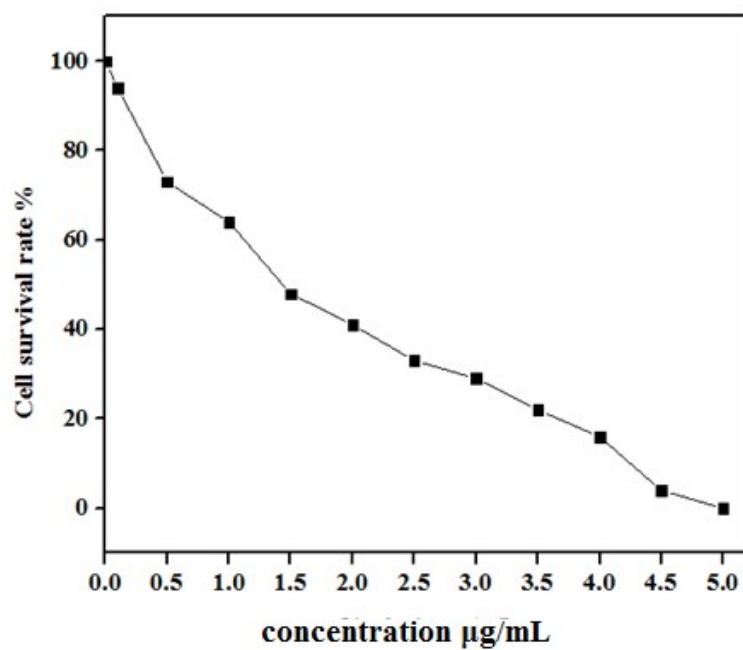

**Figure S10.** Graph of MTT assay after 24 h showing the rate of viability of KB cells after exposure to different concentrations (0.5, 1.0, 1.5, 2.0, 2.5, 3.0, 3.5, 4.0, 4.5, 5.0  $\mu\text{g/ml}$ ) of the 5-FU loaded GG-g-L- $\beta$ -CD
